# Supplementary material for: Phytochemical Profiling and Anticancer Potential of Pistachio Wastes Against MCF-7 Breast Cancer Cells: A Metabolic and Apoptotic Pathway Analysis
Source: Research Square preprint supplement (doi:10.21203/rs.3.rs-5989525/v1), 2025-03-03

**Supp** **Table 1.** The deviations in total content of prominent moieties according to pistachio wastes and extraction methods.

| Source | | TPC (mM) | TFC (mM) | Tant (mg/L) | Tprot (%) | Tcarb (%) |
| --- | --- | --- | --- | --- | --- | --- |
| Hull |  | 19.57 ± 16.70 a | 10.94 ± 13.92 a | 113.47 ± 68.11 a | 1.08 ± 0.78 a | 22.82 ± 4.54 a |
| Shell |  | 6.10 ± 5.73 b | 11.07 ± 14.75 a | 38.82 ± 34.23 b | 0.56 ± 0.47 b | 18.74 ± 9.98 b |
| Solvent | | |  |  |  |  |
| Ethyl acetate |  | 5.14 ± 2.66 b | 2.28 ± 0.26 b | 135.60 ± 57.56 a | 1.22 ± 0.10 a | 19.18 ± 6.96 b |
| Hexane |  | 5.62 ± 4.12 b | 0.66 ± 0.23 c | 19.69 ± 12.97 b | 0.08 ± 0.02 b | 29.04 ± 3.39 a |
| Methanol |  | 27.74 ± 15.42 a | 30.08 ± 1.27 a | 73.14 ± 52.48 b | 1.17 ± 0.74 a | 14.13 ± 3.06 c |
| Source x Solvent | | |  |  |  |  |
| Hull | Ethyl acetate | 7.57 ± 0.30 d | 2.50 ± 0.10 c | 187.92 ± 7.52 a | 1.30 ± 0.05 b | 25.49 ± 1.02 b |
| Hexane | 9.37 ± 0.37 c | 0.86 ± 0.03 de | 31.51 ± 1.26 d | 0.09 ± 0.00 e | 26.10 ± 1.04 b |
| Methanol | 41.78 ± 1.67 a | 29.46 ± 1.18 b | 120.97 ± 4.84 b | 1.84 ± 0.07 a | 16.88 ± 0.68 c |
| Shell | Ethyl acetate | 2.72 ± 0.11 e | 2.05 ± 0.08 cd | 83.27 ± 3.33 c | 1.14 ± 0.05 c | 12.86 ± 0.51 d |
| Hexane | 1.87 ± 0.07 e | 0.45 ± 0.02 e | 7.88 ± 0.32 e | 0.06 ± 0.00 e | 31.98 ± 1.28 a |
| Methanol | 13.71 ± 0.55 b | 30.70 ± 1.23 a | 25.32 ± 1.01 d | 0.50 ± 0.02 d | 11.38 ± 0.45 d |
| ANOVA | | |  |  |  |  |
| F*Solvent* |  | 1796.42*** | 3380.23*** | 1293.25*** | 1413.85*** | 441.41*** |
| F*Source* |  | 1467.51*** | 0.15ns | 1605.90*** | 671.42*** | 96.01*** |
| F*Source x Solvent* |  | 435.21*** | 2.88ns | 189.46*** | 443.81*** | 167.32*** |

Different letters in the same column indicates differences at p≤0.05 according to Fischer’s LSD test. *** indicates significance at p≤0.001 and ns:not significant. TPC: total phenolic content, TFC: total flavonoid content, Tant: total anthocyanin, Tprot: total soluble protein, Tcarb: total soluble carbohydrates

**Supp. Table 2.** Antioxidant activities according to pistachio wastes and extraction methods

| Source | | DPPH (mM) | EC50 (mg/ml) | CUPRAC (mM) | ABTS (mM) | FRAP (mM) |
| --- | --- | --- | --- | --- | --- | --- |
| Hull |  | 22.39 ± 19.55 a | 6.24 ± 0.32 a | 82.89 ± 109.51 a | 32.13 ± 33.79 a | 24.22 ± 24.50 b |
| Shell |  | 19.79 ± 21.71 b | 9.66 ± 3.13 b | 23.04 ± 23.65 a | 31.53 ± 33.53 a | 25.74 ± 27.10 a |
| Solvent | |  |  |  |  |  |
| Ethyl acetate |  | 7.91 ± 1.95 b | 7.90 ± 1.98 a | 16.67 ± 2.49 b | 10.95 ± 0.78 b | 12.73 ± 0.64 b |
| Hexane |  | 6.81 ± 2.51 b | 9.87 ± 3.70 b | 1.22 ± 0.17 b | 7.91 ± 1.14 c | 3.31 ± 0.19 c |
| Methanol |  | 48.55 ± 1.74 a | 6.09 ± 0.25 c | 141.00 ± 95.95 a | 76.62 ± 2.80 a | 58.90 ± 3.52 a |
| Source x Solvent | |  |  |  |  |  |
| Hull | Ethyl acetate | 9.67 ± 0.39 b | 6.11 ± 0.28 a | 18.88 ± 0.75 c | 10.34 ± 0.41 b | 13.14 ± 0.53 c |
| Hexane | 9.08 ± 0.36 b | 6.51 ± 0.30 b | 1.37 ± 0.05 d | 8.92 ± 0.36 bc | 3.18 ± 0.13 d |
| Methanol | 48.42 ± 1.94 a | 6.10 ± 0.28 c | 228.42 ± 9.13 a | 77.13 ± 3.08 a | 56.33 ± 2.25 b |
| Shell | Ethyl acetate | 6.14 ± 0.25 c | 9.68 ± 0.45 c | 14.46 ± 0.58 c | 11.57 ± 0.46 b | 12.32 ± 0.49 c |
| Hexane | 4.53 ± 0.18 c | 13.23 ± 0.61 c | 1.08 ± 0.04 d | 6.91 ± 0.28 c | 3.44 ± 0.14 d |
| Methanol | 48.68 ± 1.95 a | 6.07 ± 0.28 c | 53.57 ± 2.14 b | 76.10 ± 3.04 a | 61.47 ± 2.46 a |
| ANOVA | |  |  |  |  |  |
| F*Solvent* |  | 2574.65*** | 141,87*** | 2376.90*** | 2801.34*** | 2730.21*** |
| F*Source* |  | 23.17*** | 347,18*** | 1087.53*** | 0.51ns | 5.40* |
| F*Source x Solvent* |  | 7.30** | 112,95*** | 1004.07*** | 1.28ns | 7.76** |

Different letters in the same column indicates differences at p≤0.05 according to Fischer’s LSD test. *, **, *** indicates significance at p≤0.05, p≤0.01, and p≤0.001, respectively. ns:not significant.

1. The original images of Flow Cytometer Analysis(Cell Cycle and Apoptosis)


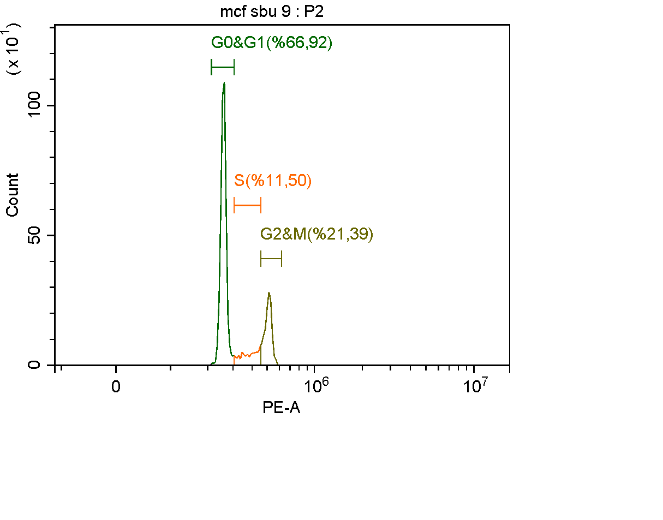

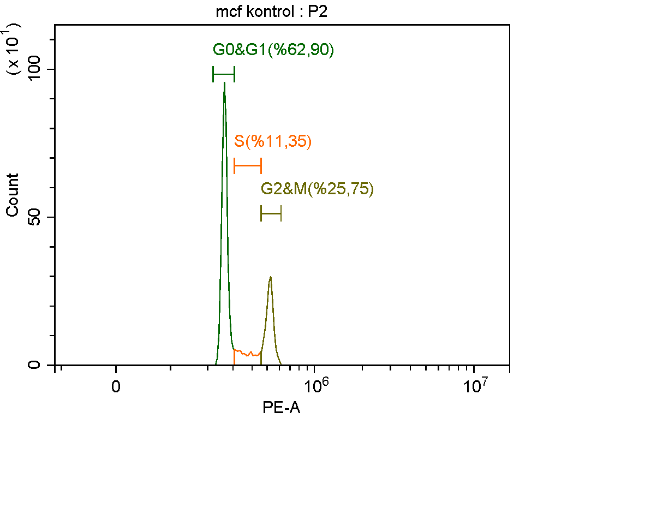

Supplement: Supplementary file 2 [file 6bf335f2ce785f4248dc9521.docx]
