# Supplementary figures and images for: Phytochemical Profiling and Anticancer Potential of Pistachio Wastes Against MCF-7 Breast Cancer Cells: A Metabolic and Apoptotic Pathway Analysis
Source: Research Square preprint supplement (doi:10.21203/rs.3.rs-5989525/v1), 2025-03-03

1. Flow Cytometer Analysis(Cell Cycle and Apoptosis)


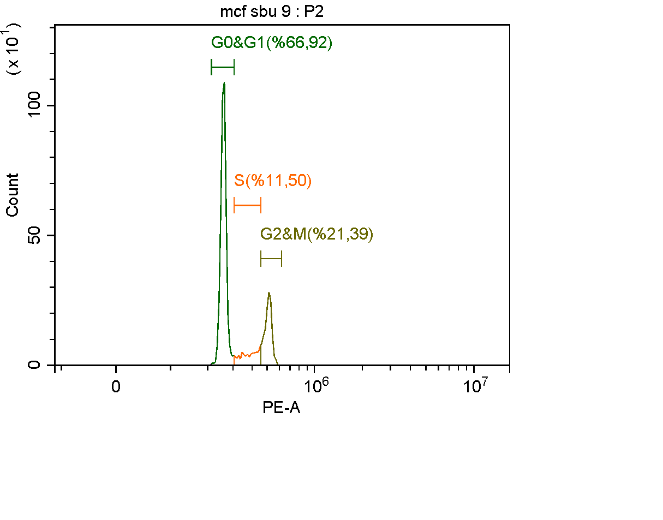

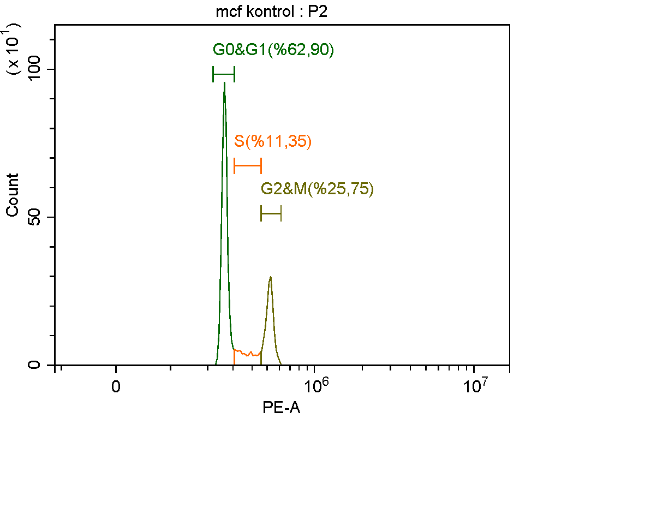

Supplement: Supplementary file 1 [file 28da5299c41cdeaa2d0f0c78.docx]
